# Supplementary material for: Phosphorylation of the small heat shock protein HspB1 regulates cytoskeletal recruitment and cell motility
Source: PubMed Central journal article supplement — Mol Biol Cell. 2022 Sep 7;33(11):ar100. doi: 10.1091/mbc.E22-02-0057 (PMC9582803; doi:10.1091/mbc.e22-02-0057), 2022-09-07
Supplement: mbc-33-ar100-s001.pdf [file mbc-33-ar100-s001.pdf]

# Supplementary Materials

*Molecular Biology of the Cell*

Hoffman *et al.*

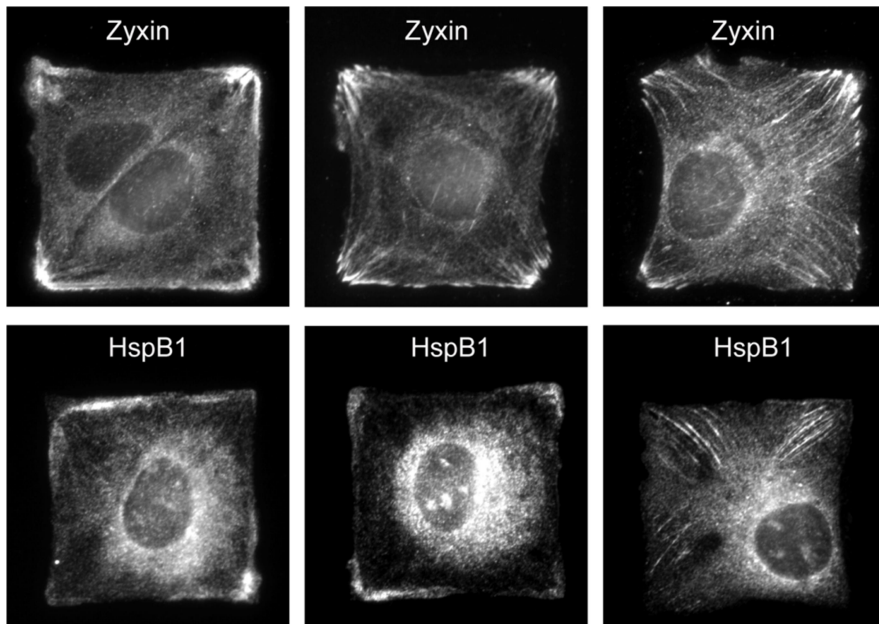

**Supplemental Figure S1. Zyxin and HspB1 in geometrically constrained cells.**

Indirect immunofluorescence widefield microscopy of cells on fibronectin-coated islands of 47  $\mu\text{m}$  X 47  $\mu\text{m}$  dimension.

Zyxin (top row) and HspB1 (bottom row) display several patterns, including accumulation at edges and corners of the square cells, and along linear streaks emanating from the corners.

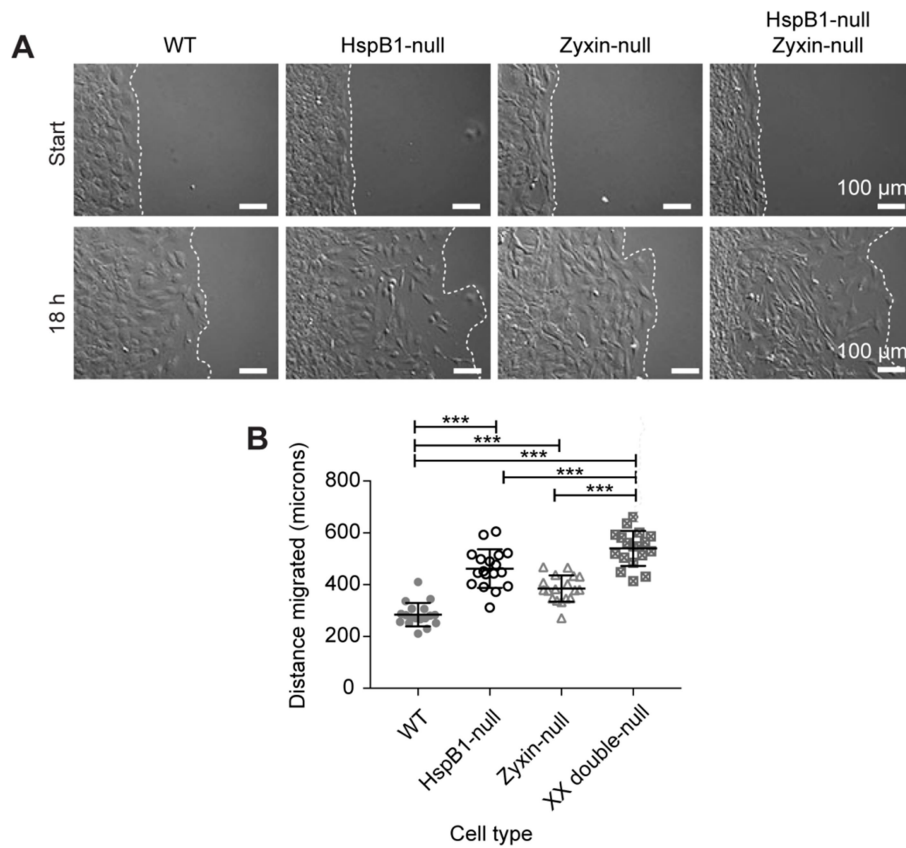

**Supplemental Figure S2. Enhanced motility in cells double-null for HspB1 and zyxin.**

A. Time-lapse microscopy (10 minute intervals for 18 hour total time) of Start and Finish (18 h) of edge migration assay for parental WT cells, HspB1-null cells, zyxin-null cells, and XX HspB1/zyxin-double null cells. B. Graph of distance migrated over 18 h period for each cell type (mean with standard deviations). Unpaired t-tests were used to determine p-values \*\*\*p < 0.0001.

**Supplemental Table I. Western Immunoblot Quantitation**

Western immunoblot films were scanned into digital images, then quantified using FIJI gel scan analysis tool.

| Figure | Antibody    | Experiment               | Intensity (counts) | Change (X-fold) |
|--------|-------------|--------------------------|--------------------|-----------------|
| 1B     | pS86-HspB1  | Unstretched              | 44834              | 1x              |
| 1B     | pS86-HspB1  | Stretch 60 mins          | 85892              | 1.9x            |
| 1B     | Total HspB1 | Unstretched              | 76068              | 1x              |
| 1B     | Total HspB1 | Stretch 60 mins          | 74845              | 1x              |
| 1B     | Vinculin    | Unstretched              | 57375              | 1x              |
| 1B     | Vinculin    | Stretch 60 mins          | 65349              | 1.1x            |
| 1E     | pS86-HspB1  | Unstretched              | 19600              | 1x              |
| 1E     | pS86-HspB1  | Stretch 15 mins          | 53449              | 2.7x            |
| 1E     | pS86-HspB1  | Stretch 60 mins          | 24188              | 1.2x            |
| 1E     | Vinculin    | Unstretched              | 56054              | 1x              |
| 1E     | Vinculin    | Stretch 15 mins          | 49893              | 0.9x            |
| 1E     | Vinculin    | Stretch 60 mins          | 30372              | 0.5x            |
| 1E     | pS86-HspB1  | SB203580+Unstretched     | 31641              | 1x              |
| 1E     | pS86-HspB1  | SB203580+Stretch 15 mins | 22268              | 0.7x            |
| 1E     | pS86-HspB1  | SB203580+Stretch 60 mins | 23626              | 0.7x            |
| 1E     | Vinculin    | SB203580+Unstretched     | 36960              | 1x              |
| 1E     | Vinculin    | SB203580+Stretch 15 mins | 42627              | 1.2x            |
| 1E     | Vinculin    | SB203580+Stretch 60 mins | 16450              | 0.4x            |
|        |             |                          |                    |                 |
| 3A     | Total HspB1 | WT cells                 | 129556             | 1x              |
| 3A     | Total HspB1 | HspB1-null cells         | 0                  | 0               |
| 3A     | Total HspB1 | WT HspB1                 | 70838              | 0.5x            |
| 3A     | Total HspB1 | S15,86A HspB1            | 62016              | 0.5x            |
| 3A     | Total HspB1 | S15,86E HspB1            | 60733              | 0.5x            |
| 3A     | Vinculin    | WT cells                 | 78700              | 1x              |
| 3A     | Vinculin    | HspB1-null cells         | 58910              | 0.8x            |
| 3A     | Vinculin    | WT HspB1                 | 75050              | 1x              |
| 3A     | Vinculin    | S15,86A HspB1            | 59696              | 0.8x            |
| 3A     | Vinculin    | S15,86E HspB1            | 41513              | 0.5x            |
|        |             |                          |                    |                 |
| 5A     | Phospho-p38 | WT Unstretched           | 32716              | 1x              |
| 5A     | Phospho-p38 | WT Stretch 15 mins       | 110646             | 3.4x            |
| 5A     | Phospho-p38 | WT Stretch 60 mins       | 111140             | 3.4x            |
| 5A     | Phospho-p38 | Null Unstretched         | 48211              | 1x              |
| 5A     | Phospho-p38 | Null Stretch 15 mins     | 82982              | 1.7x            |
| 5A     | Phospho-p38 | Null Stretch 60 mins     | 93861              | 1.9x            |
| 5A     | Total p38   | WT Unstretched           | 73180              | 1x              |
| 5A     | Total p38   | WT Stretch 15 mins       | 77129              | 1x              |
| 5A     | Total p38   | WT Stretch 60 mins       | 81840              | 1x              |
| 5A     | Total p38   | Null Unstretched         | 73171              | 1x              |
| 5A     | Total p38   | Null Stretch 15 mins     | 72454              | 1x              |
| 5A     | Total p38   | Null Stretch 60 mins     | 124318             | 1.7x            |
| 5A     | pS86-HspB1  | WT Unstretched           | 20129              | 1x              |
| 5A     | pS86-HspB1  | WT Stretch 15 mins       | 52635              | 2.6x            |
| 5A     | pS86-HspB1  | WT Stretch 60 mins       | 46928              | 2.3x            |
| 5A     | Total HspB1 | WT Unstretched           | 46440              | 1x              |
| 5A     | Total HspB1 | WT Stretch 15 mins       | 38253              | 0.8x            |
| 5A     | Total HspB1 | WT Stretch 60 mins       | 53040              | 1.1x            |

Hoffman, Jensen and Beckerle: *HspB1 phosphorylation directs mechanoreponse*

|    |               |                      |        |      |
|----|---------------|----------------------|--------|------|
| 5A | Vinculin      | WT Unstretched       | 21375  | 1x   |
| 5A | Vinculin      | WT Stretch 15 mins   | 18885  | 0.9x |
| 5A | Vinculin      | WT Stretch 60 mins   | 21584  | 1x   |
| 5A | Vinculin      | Null Unstretched     | 20351  | 1x   |
| 5A | Vinculin      | Null Stretch 15 mins | 18206  | 0.9x |
| 5A | Vinculin      | Null Stretch 60 mins | 22873  | 1x   |
| 5B | pS86-HspB1    | WT HspB1 Unstretched | 18445  | 1x   |
| 5B | pS86-HspB1    | WT HspB1 Stretch 60m | 77109  | 4.2x |
| 5B | Total HspB1   | WT HspB1 Unstretched | 74916  | 1x   |
| 5B | Total HspB1   | WT HspB1 Stretch 60m | 101954 | 1.4x |
| 5B | Total HspB1   | S15,86A Unstretched  | 69119  | 1x   |
| 5B | Total HspB1   | S15,86A Stretch 60m  | 58869  | 0.9x |
| 5B | Total HspB1   | S15,86E Unstretched  | 54054  | 1x   |
| 5B | Total HspB1   | S15,86E Stretch 60m  | 66639  | 1.2x |
| 5B | Vinculin      | Null Unstretched     | 163297 | 1x   |
| 5B | Vinculin      | Null Stretch 60m     | 95676  | 0.6x |
| 5B | Vinculin      | WT HspB1 Unstretched | 104120 | 1x   |
| 5B | Vinculin      | WT HspB1 Stretch 60m | 134179 | 1.3x |
| 5B | Vinculin      | S15,86A Unstretched  | 73655  | 1x   |
| 5B | Vinculin      | S15,86A Stretch 60m  | 75472  | 1x   |
| 5B | Vinculin      | S15,86E Unstretched  | 76563  | 1x   |
| 5B | Vinculin      | S15,86E Stretch 60m  | 49387  | 0.6x |
|    |               |                      |        |      |
| 6A | Total HspB1   | WT HspB1 Unstretched | 26249  | 1x   |
| 6A | Total HspB1   | WT HspB1 Stretch 60m | 34940  | 1.3x |
| 6A | Total HspB1   | S15A Unstretched     | 20559  | 1x   |
| 6A | Total HspB1   | S15A Stretch 60m     | 20007  | 1x   |
| 6A | Total HspB1   | S86A Unstretched     | 39292  | 1x   |
| 6A | Total HspB1   | S86A Stretch 60m     | 39400  | 1x   |
| 6A | pS86-HspB1    | WT HspB1 Unstretched | 24500  | 1x   |
| 6A | pS86-HspB1    | WT HspB1 Stretch 60m | 42059  | 1.7x |
| 6A | pS86-HspB1    | S15A Unstretched     | 15371  | 1x   |
| 6A | pS86-HspB1    | S15A Stretch 60m     | 33833  | 2.2x |
| 6A | Total p38     | WT HspB1 Unstretched | 34983  | 1x   |
| 6A | Total p38     | WT HspB1 Stretch 60m | 31194  | 0.9x |
| 6A | Total p38     | S15A Unstretched     | 18286  | 1x   |
| 6A | Total p38     | S15A Stretch 60m     | 17601  | 1x   |
| 6A | Total p38     | S86A Unstretched     | 37738  | 1x   |
| 6A | Total p38     | S86A Stretch 60m     | 35613  | 0.9x |
| 6A | Phospho-p38   | WT HspB1 Unstretched | 10083  | 1x   |
| 6A | Phospho-p38   | WT HspB1 Stretch 60m | 39056  | 4x   |
| 6A | Phospho-p38   | S15A Unstretched     | 12315  | 1x   |
| 6A | Phospho-p38   | S15A Stretch 60m     | 29192  | 2.4x |
| 6A | Phospho-p38   | S86A Unstretched     | 7486   | 1x   |
| 6A | Phospho-p38   | S86A Stretch 60m     | 26717  | 3.6x |
| 6A | Phospho-zyxin | WT HspB1 Unstretched | 8184   | 1x   |
| 6A | Phospho-zyxin | WT HspB1 Stretch 60m | 39174  | 4.8x |
| 6A | Phospho-zyxin | S15A Unstretched     | 21157  | 1x   |
| 6A | Phospho-zyxin | S15A Stretch 60m     | 30473  | 1.4x |
| 6A | Phospho-zyxin | S86A Unstretched     | 18551  | 1x   |
| 6A | Phospho-zyxin | S86A Stretch 60m     | 31044  | 1.7x |
| 6A | Vinculin      | WT HspB1 Unstretched | 30669  | 1x   |
| 6A | Vinculin      | WT HspB1 Stretch 60m | 37998  | 1.2x |

Hoffman, Jensen and Beckerle: *HspB1 phosphorylation directs mechanoresponse*

|    |             |                  |       |      |
|----|-------------|------------------|-------|------|
| 6A | Vinculin    | S15A Unstretched | 36171 | 1x   |
| 6A | Vinculin    | S15A Stretch 60m | 30599 | 0.8x |
| 6A | Vinculin    | S86A Unstretched | 31256 | 1x   |
| 6A | Vinculin    | S86A Stretch 60m | 31899 | 1x   |
|    |             |                  |       |      |
| 7C | Total HspB1 | HspB1-null cells | 0     |      |
| 7C | Total HspB1 | WT HspB1 rescue  | 26817 | 1x   |
| 7C | Total HspB1 | S15,86A rescue   | 48079 | 1.8x |
| 7C | Total HspB1 | S15,86E rescue   | 35416 | 1.3x |
| 7C | Vinculin    | HspB1-null cells | 37960 | 0.7x |
| 7C | Vinculin    | WT HspB1 rescue  | 58110 | 1x   |
| 7C | Vinculin    | S15,86A rescue   | 51677 | 0.9x |
| 7C | Vinculin    | S15,86E rescue   | 55201 | 0.9x |

**Supplemental Table II. HspB1 Reagents and Resources**

Resource Details for Materials and Methods used in this paper: Antibodies and detection reagents, cells and mutants, assays, microscopes, software and algorithms.

| REAGENT                                                                              | RESOURCE                        | IDENTIFIER                                                             | NOTES                   |
|--------------------------------------------------------------------------------------|---------------------------------|------------------------------------------------------------------------|-------------------------|
| <b>Antibodies</b>                                                                    |                                 |                                                                        |                         |
| Hsp25 rab<br>(total HspB1)                                                           | Enzo                            | ADI-SPA-801                                                            | IF 1:200<br>WB 1:1,000  |
| PhosphoSer82-HspB1<br>rab<br>(P-HspB1) Human<br>HspB1p-Ser82 &<br>mouse HspB1p-Ser86 | CST                             | 9709                                                                   | IF 1:150<br>WB 1:1,000  |
| PhosphoSer15-HspB1<br>rab                                                            | CST                             | 2404                                                                   | NA                      |
| P38 rab                                                                              | CST                             | 4511                                                                   | WB 1:1000               |
| Phospho-p38 rab                                                                      | CST                             | 9212                                                                   | WB 1:1000               |
| Vinculin mab                                                                         | Sigma                           | V-9131                                                                 | IF 1:600<br>WB 1:10,000 |
| Zyxin B72 rab                                                                        | Beckerle Lab<br>Millipore       | (Hoffman, Nix et al. 2003)<br>#1387                                    | IF 1:600<br>WB 1:10,000 |
| Phospho-zyxin<br>huS142/143 rab                                                      | CST                             | #8467<br>#4863                                                         | WB 1:2000               |
| AlexaFluor488-<br>antibodies                                                         | Molecular Probes/<br>Invitrogen | 488-anti-Mouse A11029<br>488-anti-Rabbit A11008                        | IF 1:100                |
| AlexaFluor568-<br>antibodies                                                         | Molecular Probes/<br>Invitrogen | 568-anti-Mouse 11031<br>568-anti-Rabbit A11036                         | IF 1:100                |
| AlexaFluor647-antibody                                                               | Molecular Probes/<br>Invitrogen | 647-anti-Rabbit A21245<br>647-anti-Mouse<br>A21236                     | IF 1:100                |
| AlexaFluor-Phalloidin<br>to detect F-actin                                           | Molecular Probes/<br>Invitrogen | 488-phalloidin A12379<br>568-phalloidin A1238<br>647-phalloidin A22287 | IF 1:150-1:100          |
| Far Red-SiR-actin<br>Binds F-actin                                                   | Cytoskeleton                    | CY-SC001                                                               | 1:3000                  |
| DAPI<br>(Nucleus)                                                                    | Molecular Probes/<br>Invitrogen | D-1306                                                                 | 0.5 uM                  |
| Hoechst<br>(Nucleus)                                                                 | Molecular Probes/<br>Invitrogen | H-1399                                                                 | 0.25 ug/ml              |
| Horseradish-<br>Peroxidase conjugated<br>antibodies                                  | GE Healthcare                   | NA934V (mouse)<br>NA931V (rabbit)                                      |                         |
| Blebbistatin                                                                         | Millipore Sigma                 | CAS 856925-71-8<br>Calbiochem                                          | 50 uM                   |
| Fibronectin                                                                          | Sigma                           | F1141                                                                  | 2.5-10 ug/ml            |
| Collagen I                                                                           | Sigma                           | 354236                                                                 |                         |
| Silicone membrane                                                                    | AAA-Acme Rubber<br>Co.          | CASS-.020x36-64909                                                     |                         |
|                                                                                      |                                 |                                                                        |                         |

Hoffman, Jensen and Beckerle: *HspB1 phosphorylation directs mechanoresponse*

|                                                           |                                                       |                                   |                                       |
|-----------------------------------------------------------|-------------------------------------------------------|-----------------------------------|---------------------------------------|
| <b>Cells</b>                                              |                                                       |                                   |                                       |
| WT mouse (parent) fibroblasts                             | Beckerle Lab                                          | (Hoffman, Jensen et al. 2006) M28 |                                       |
| HspB1-null CRISPR fibroblasts                             | Beckerle Lab                                          | (Hoffman, Jensen et al. 2017)     |                                       |
| HspB1-WTrescue fibroblasts                                | Beckerle Lab<br>PAM-mutant<br>WT HspB1                |                                   |                                       |
| HspB1-Ser15,86Ala phospho-mutant fibroblasts              | Beckerle Lab<br>PAM-mutant<br>S2A HspB1<br>Double mut |                                   |                                       |
| HspB1-Ser15,86Glu phospho-mutant fibroblasts              | Beckerle Lab<br>PAM-mutant<br>S2E HspB1<br>Double mut |                                   |                                       |
| HspB1-Ser15Ala single phospho-mutant fibroblasts          | Beckerle Lab<br>Single S15A                           |                                   |                                       |
| HspB1-Ser86Ala single phospho-mutant fibroblasts          | Beckerle Lab<br>Single S86A                           |                                   |                                       |
| HspB1/zyxin-double null cells                             | Beckerle Lab                                          | (Hoffman, Jensen et al. 2017)     |                                       |
| Zyxin-null cells                                          | Beckerle Lab                                          | (Hoffman, Jensen et al. 2006)     |                                       |
| <b>Software and Algorithms</b>                            |                                                       |                                   |                                       |
| Adobe Photoshop version CC                                | Adobe Systems Inc.                                    |                                   |                                       |
| Adobe Illustrator version CC                              | Adobe Systems Inc.                                    |                                   |                                       |
| Stress Fiber Thickness Index                              | Masaaki Yoshigi                                       | (Yoshigi, Hoffman et al. 2005)    | SFTI                                  |
| ImageJ FIJI                                               | NIH                                                   |                                   | Line profiles                         |
| Axiovision v4.8.1                                         | Zeiss                                                 |                                   | Image acquisition                     |
| Elements v.4.6                                            | Nikon                                                 |                                   | Image acquisition & analysis          |
| LASX v.3.5.7 Imaging & Lightning Deconvolution            | Leica Microsystems                                    |                                   | Image acquisition & analysis          |
| Prism V7                                                  | GraphPad                                              |                                   | Graphs and statistics                 |
| Endnote v.20.1                                            | Clarivate                                             |                                   | References                            |
| <b>Microscopes</b>                                        |                                                       |                                   |                                       |
| Zeiss Axioskop2 mot plus Widefield Fluorescent Microscope | Zeiss Microscopy                                      | Zeiss Axioskop2                   | For stretch                           |
| Nikon Widefield Fluorescent Microscope                    | Nikon Microscopy                                      | Nikon Ti Eclipse                  | For areas, stretch, migration         |
| Leica SP8 Spinning Disk Confocal Microscope               | Leica Microsystems                                    | Leica SP8 DMI8                    | For P-hsp & Squares & Live Retrograde |



Hoffman, Jensen and Beckerle: *HspB1 phosphorylation directs mechanoresponse*
